# Supplementary material for: Ultrasonic Irradiation: Synthesis, Characterization, and Preliminary Antimicrobial Activity of Novel Series of 4,6-Disubstituted-1,3,5-triazine Containing Hydrazone Derivatives
Source: Hindawi journal article supplement (doi:10.1155/2016/3464758), 2016-01-01

## Supporting Information

### Ultrasonic Irradiation: Synthesis, Characterization, and Preliminary Antimicrobial Activity of Novel Series of 4,6-disubstituted-1,3,5-Triazine Containing Hydrazone Derivatives

Hessa H. Al-Rasheed,<sup>1</sup> Monirah Al Alshaikh,<sup>1</sup> Jamal M. Khaled,<sup>2,3\*</sup> Naiyf S. Alharbi,<sup>2</sup> Ayman El-Faham<sup>1,4\*</sup>

**Figure S1.** <sup>1</sup>H NMR and <sup>13</sup>C NMR of **7a**

**Figure S2.** <sup>1</sup>H NMR and <sup>13</sup>C NMR of **7b**

**Figure S3.** <sup>1</sup>H NMR and <sup>13</sup>C NMR of **7c**

**Figure S4.** <sup>1</sup>H NMR and <sup>13</sup>C NMR of **7d**

**Figure S5.** <sup>1</sup>H NMR and <sup>13</sup>C NMR of **7e**

**Figure S6.** <sup>1</sup>H NMR and <sup>13</sup>C NMR of **7f**

**Figure S7.** <sup>1</sup>H NMR and <sup>13</sup>C NMR of **7g**

**Figure S8.** <sup>1</sup>H NMR and <sup>13</sup>C NMR of **7h**

**Figure S9.** <sup>1</sup>H NMR and <sup>13</sup>C NMR of **7i**

**Figure S10.** <sup>1</sup>H NMR and <sup>13</sup>C NMR of **7j**

**Figure S11.** LC-MS of Compound **7j**

**Figure S12.** <sup>1</sup>H NMR and <sup>13</sup>C NMR of **7k**

**Figure S13.** LC-MS of Compound **7k**

**Figure S14.** <sup>1</sup>H NMR and <sup>13</sup>C NMR of **7l**

**Figure S15.** <sup>1</sup>H NMR and <sup>13</sup>C NMR of **7m**

**Figure S16.** <sup>1</sup>H NMR and <sup>13</sup>C NMR of **7n**

**Figure S17.** <sup>1</sup>H NMR and <sup>13</sup>C NMR of **7o**

**Figure S18.** LC-MS of Compound **7o**

**Figure S1.**  $^1\text{H}$  NMR and  $^{13}\text{C}$  NMR of **7a**

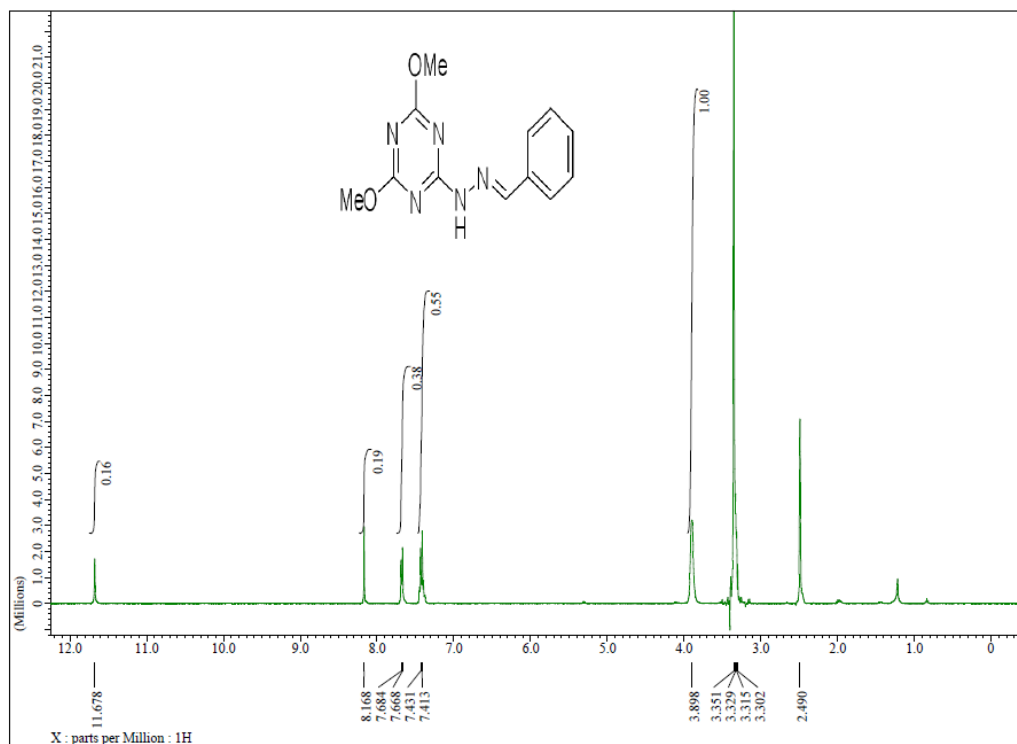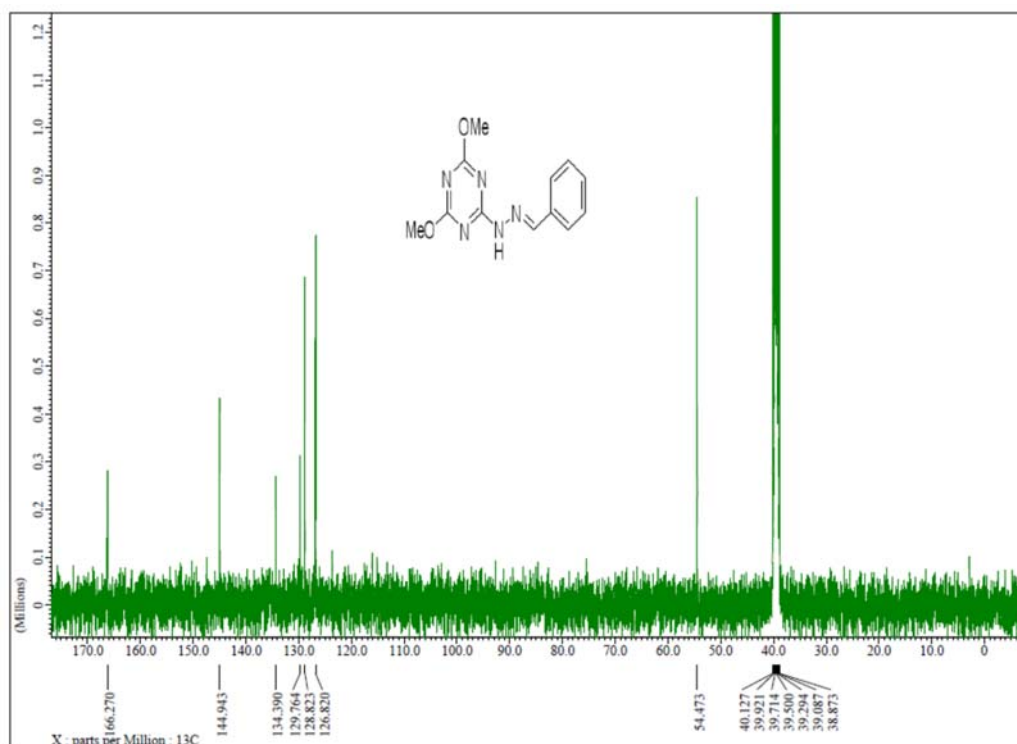

**Figure S2.**  $^1\text{H}$  NMR and  $^{13}\text{C}$  NMR of **7b**

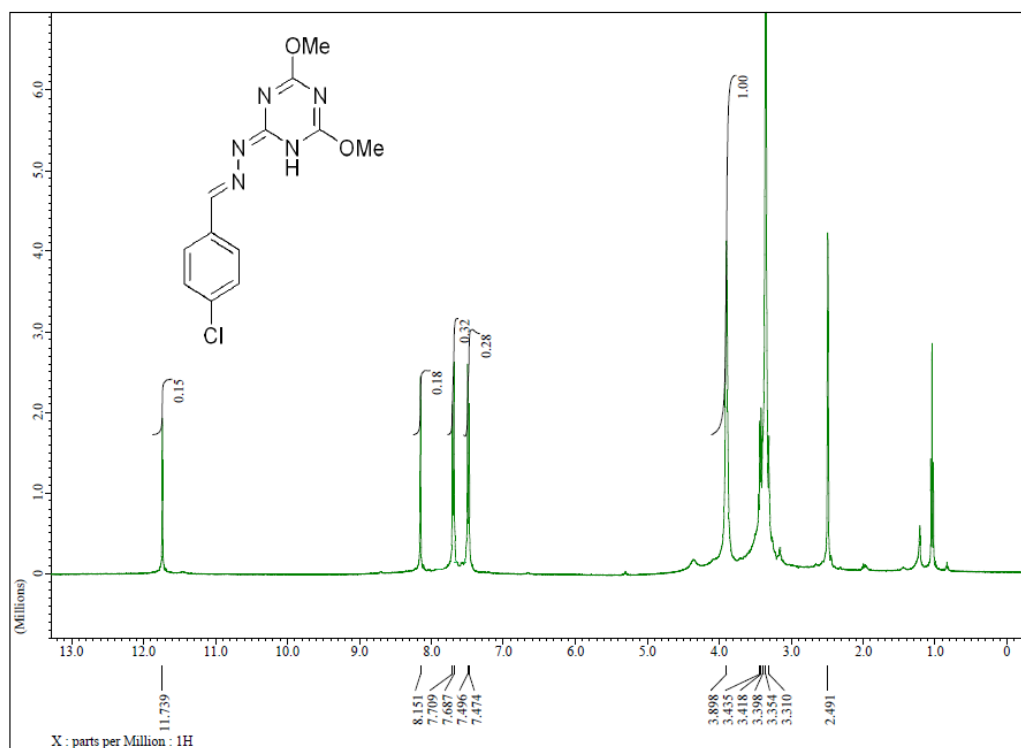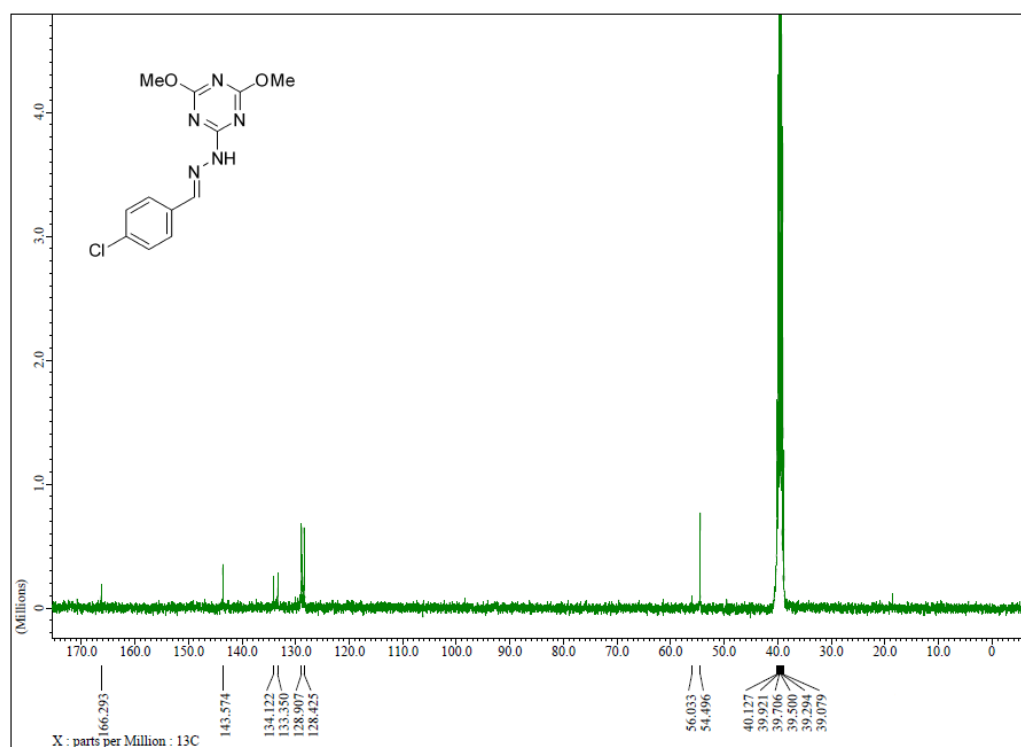

**Figure S3.**  $^1\text{H}$  NMR and  $^{13}\text{C}$  NMR of **7c**

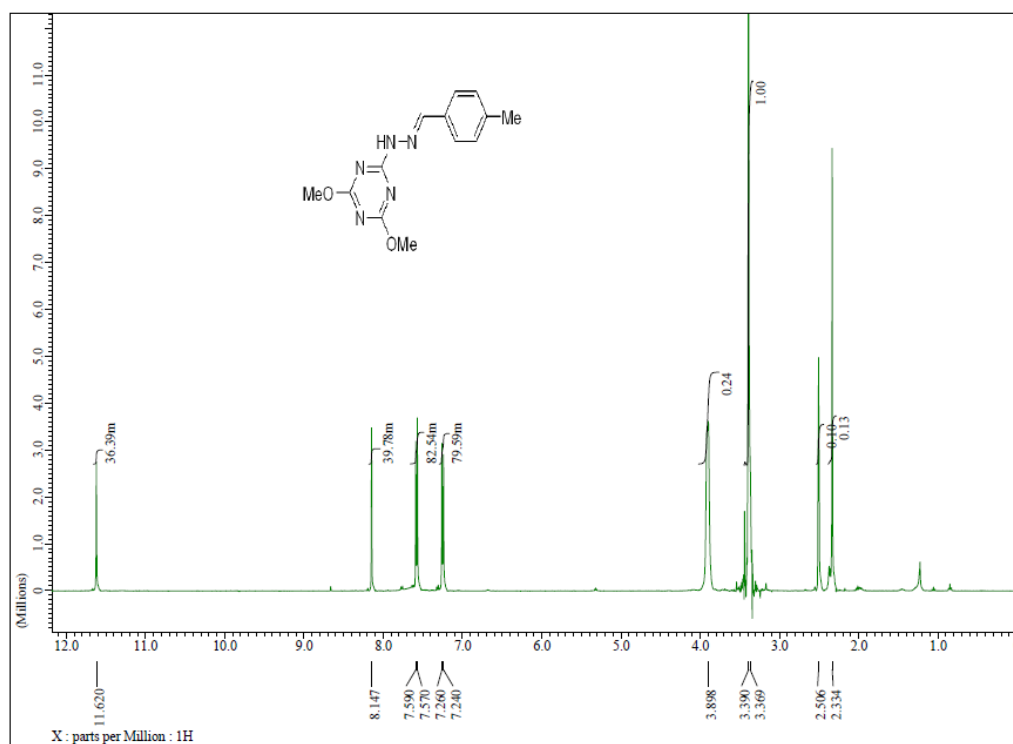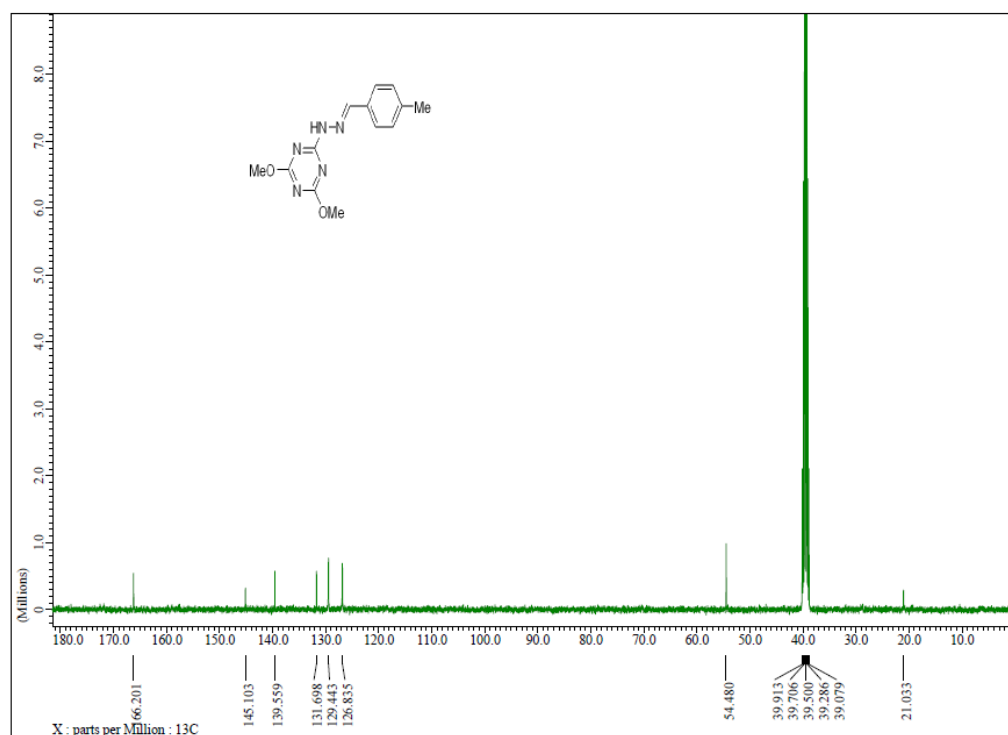

**Figure S4.**  $^1\text{H}$  NMR and  $^{13}\text{C}$  NMR of **7d**

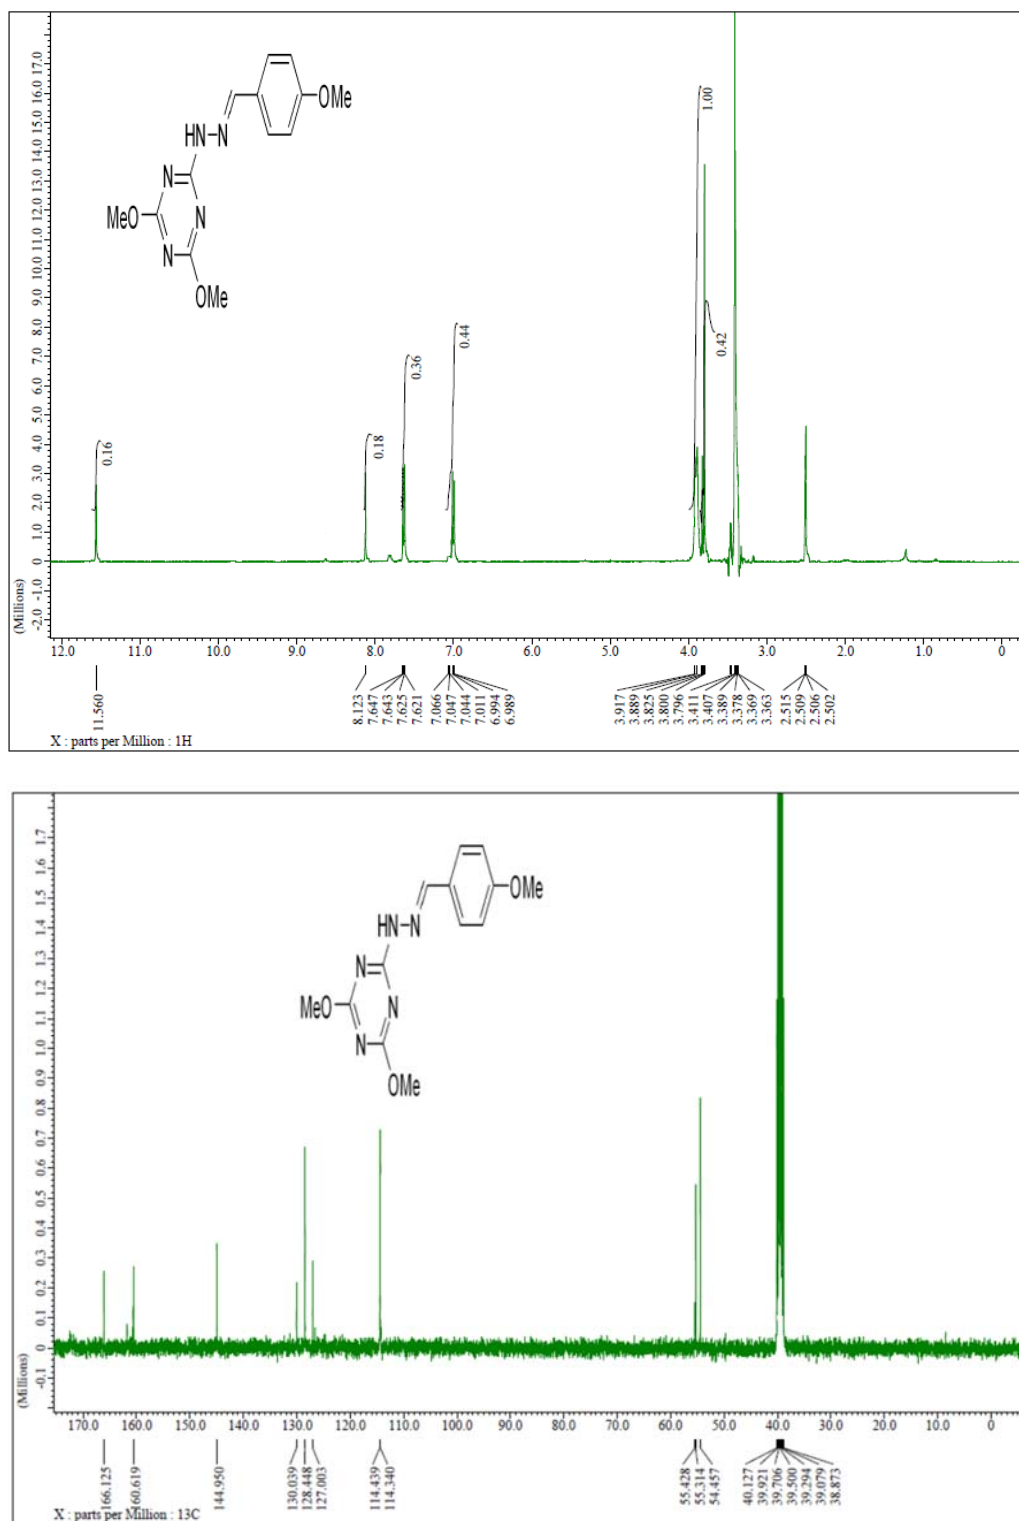

**Figure S5.**  $^1\text{H}$  NMR and  $^{13}\text{C}$  NMR of **7e**

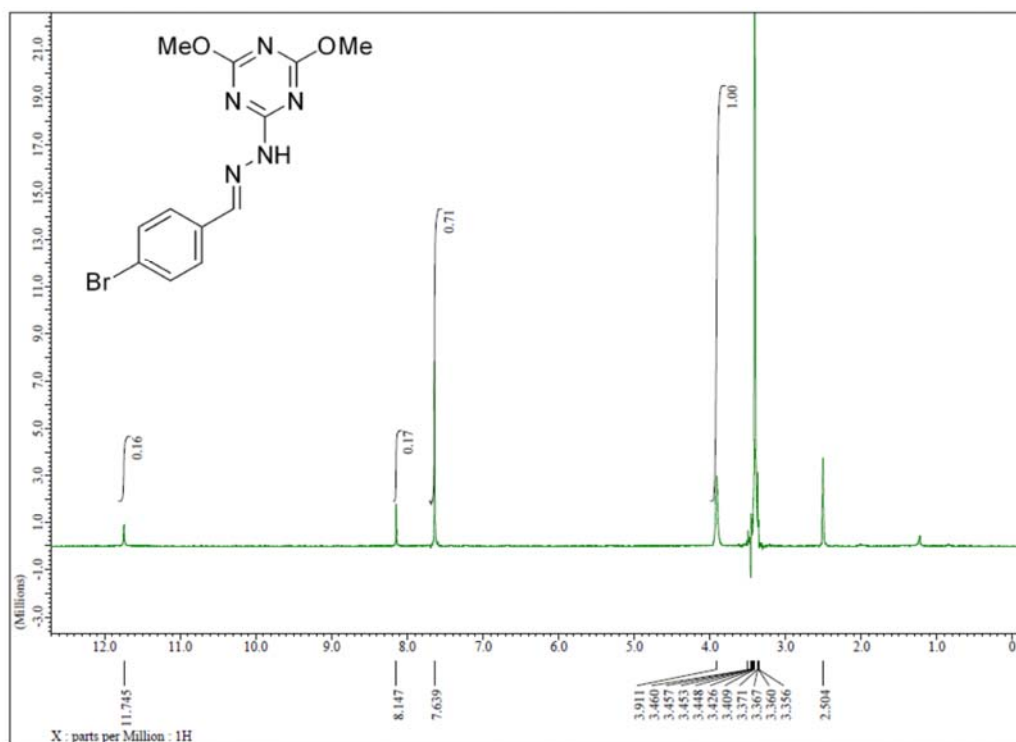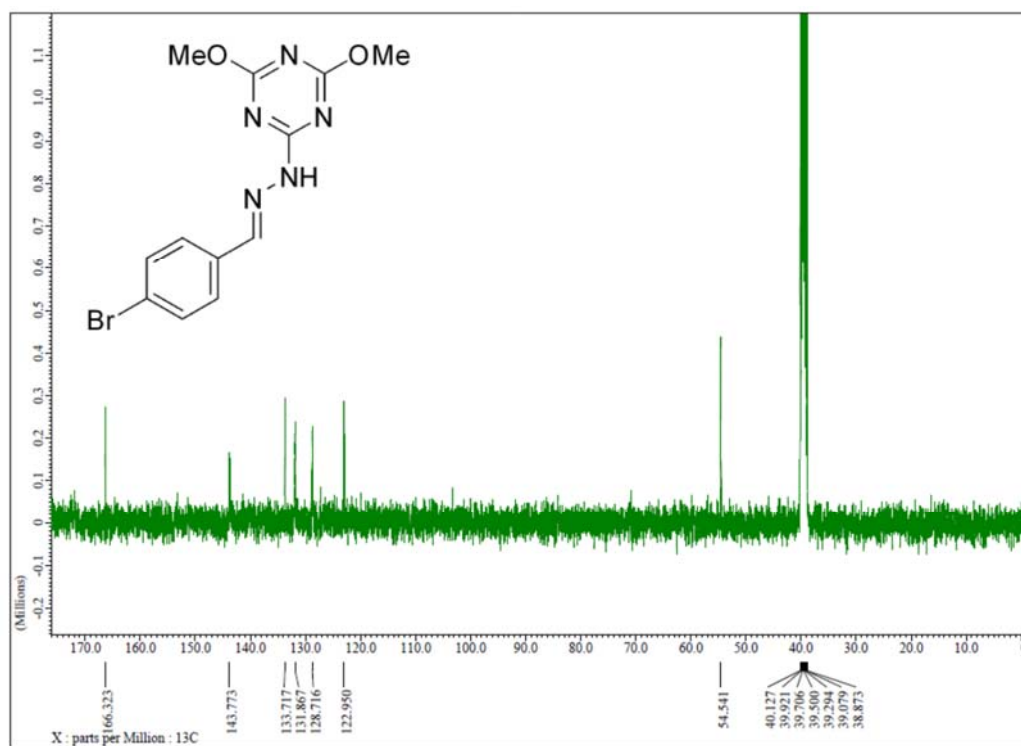

**Figure S6.**  $^1\text{H}$  NMR and  $^{13}\text{C}$  NMR of **7f**

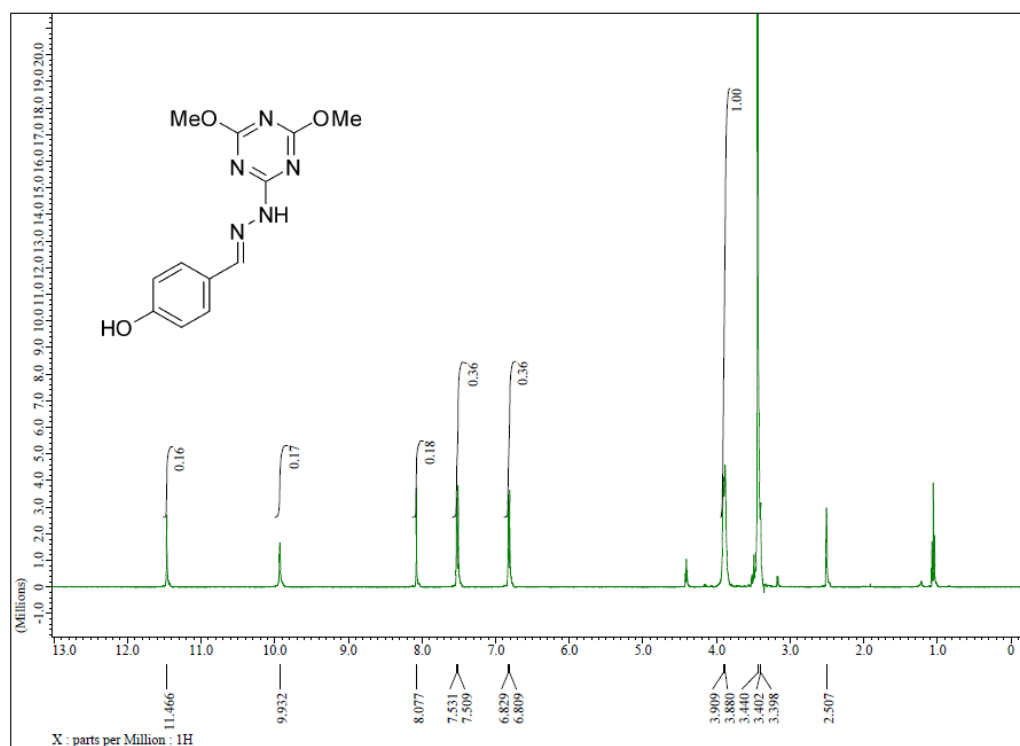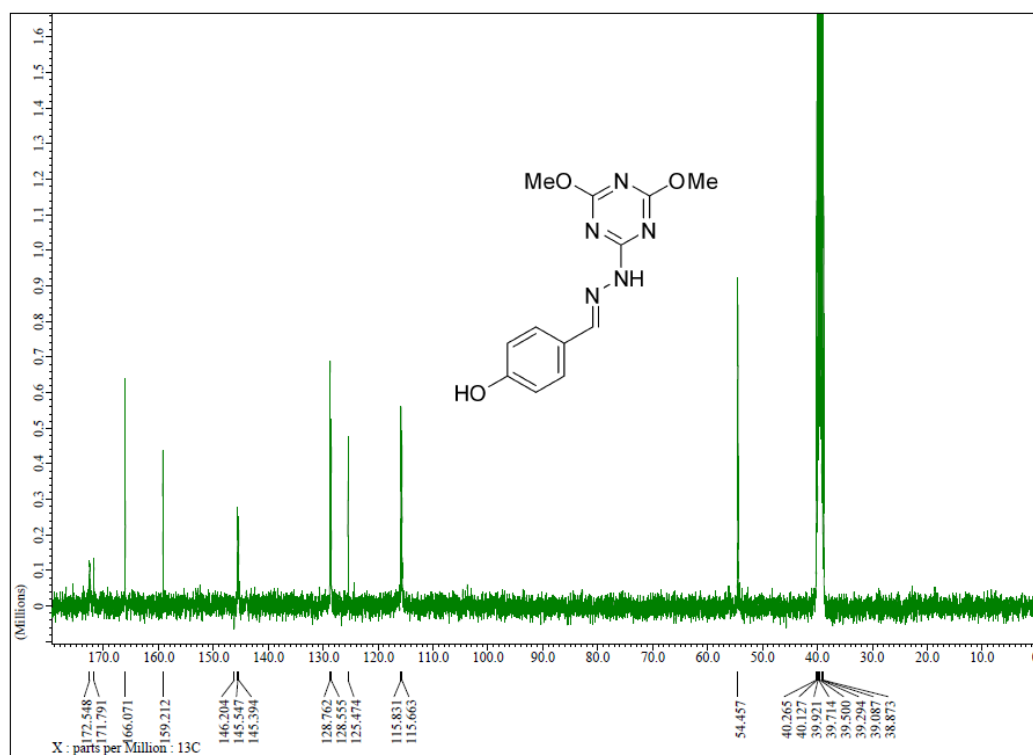

**Figure S7.**  $^1\text{H}$  NMR and  $^{13}\text{C}$  NMR of **7g**

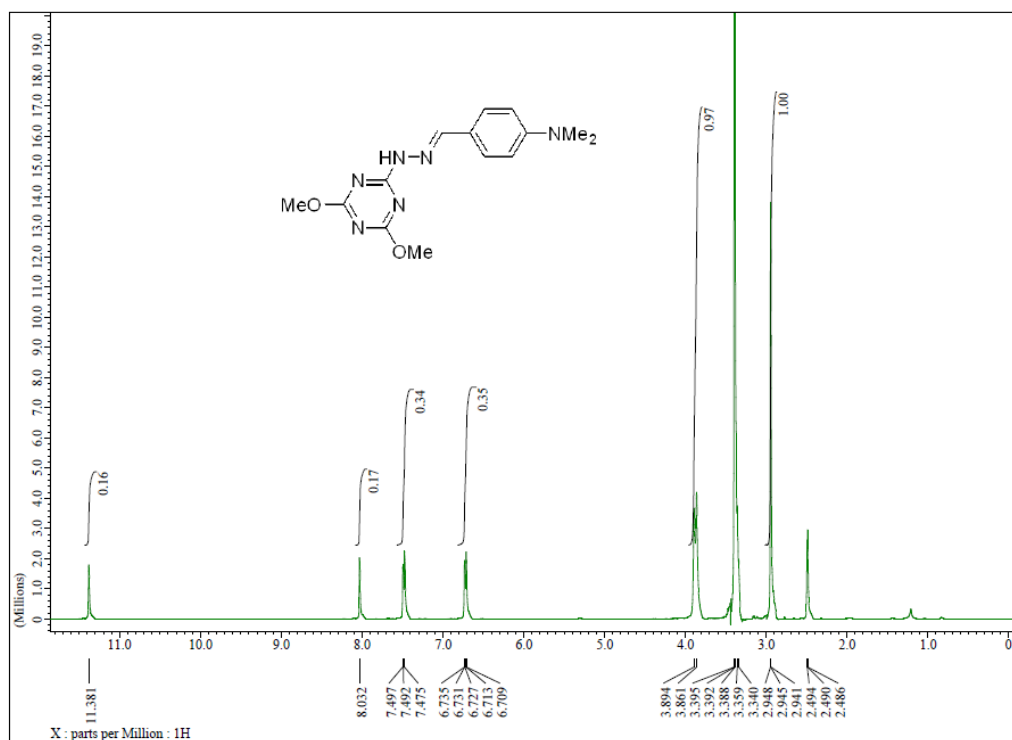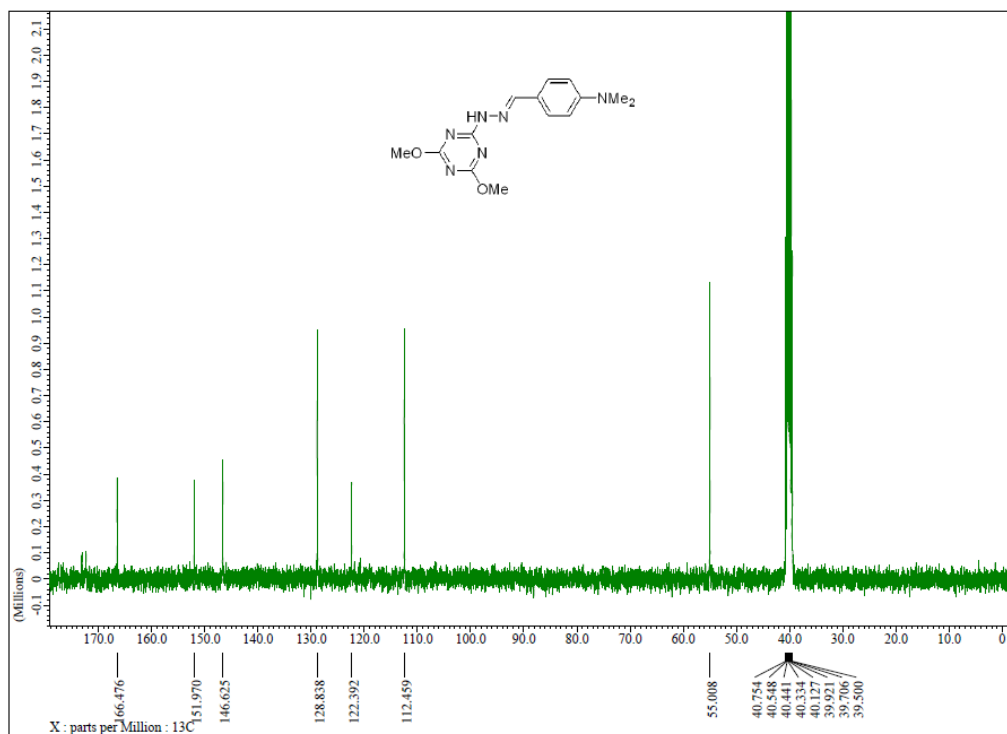

**Figure S8.**  $^1\text{H}$  NMR and  $^{13}\text{C}$  NMR of **7h**

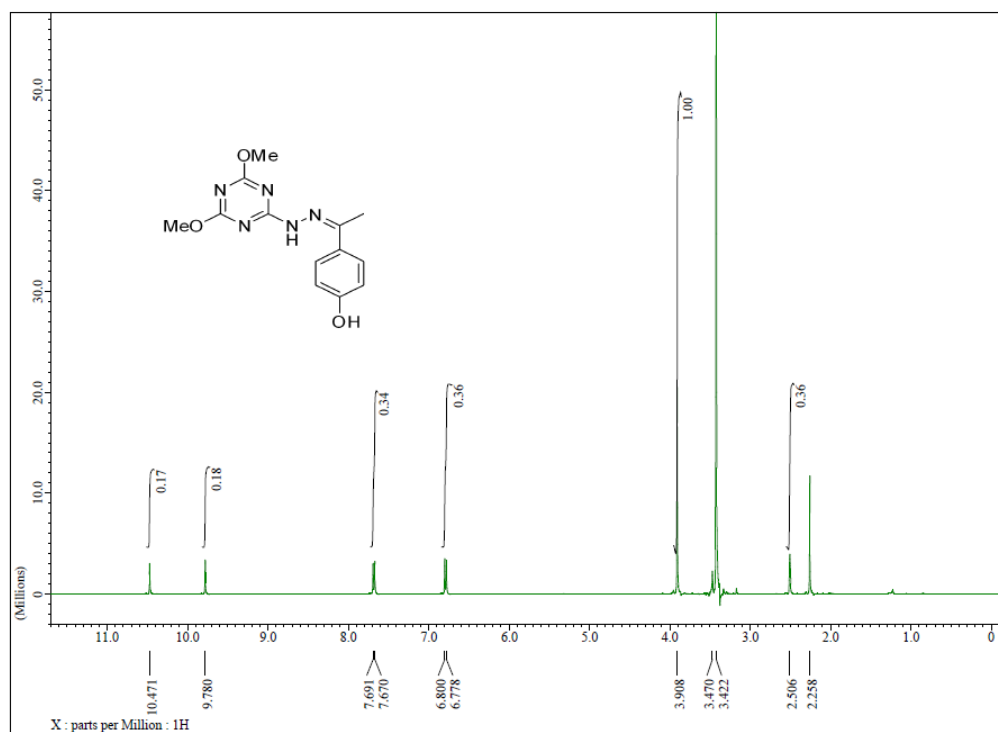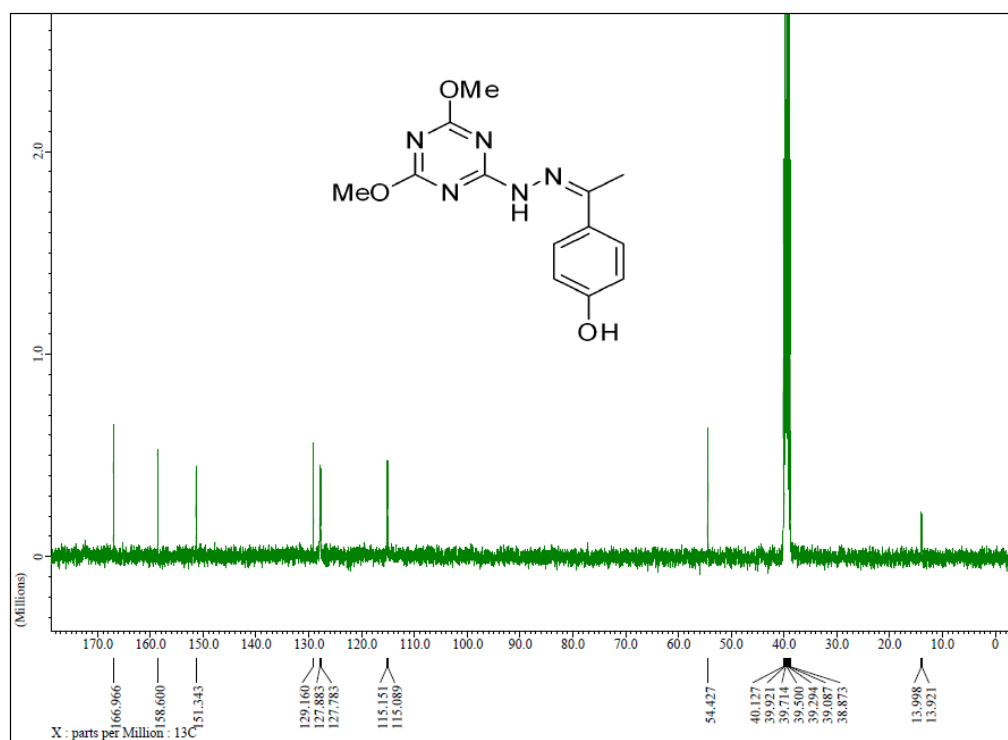

**Figure S9.**  $^1\text{H}$  NMR and  $^{13}\text{C}$  NMR of **7i**

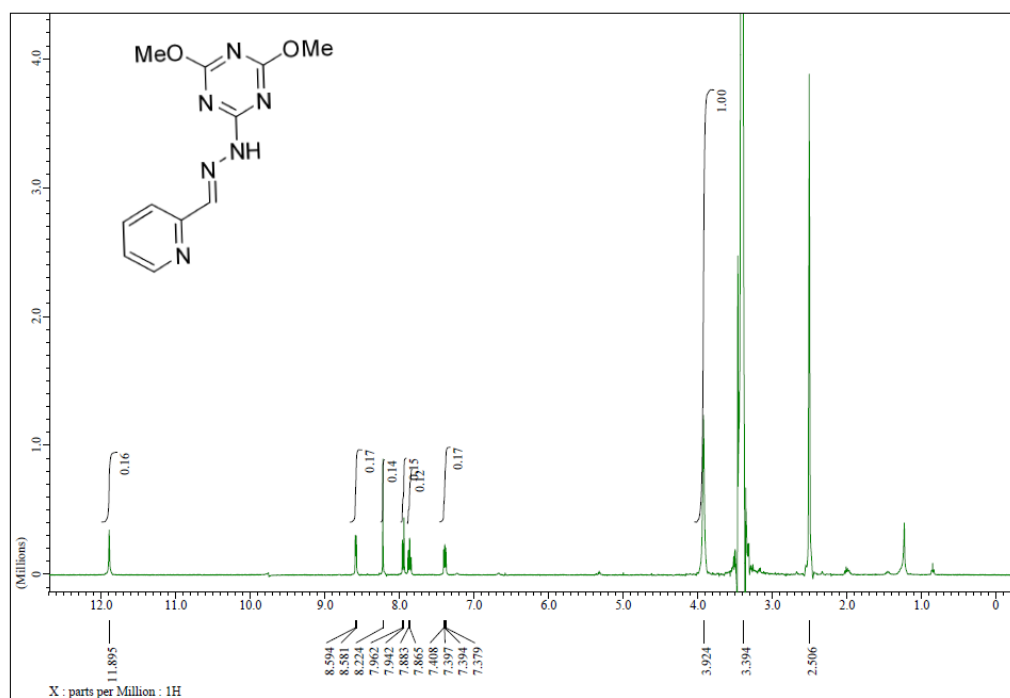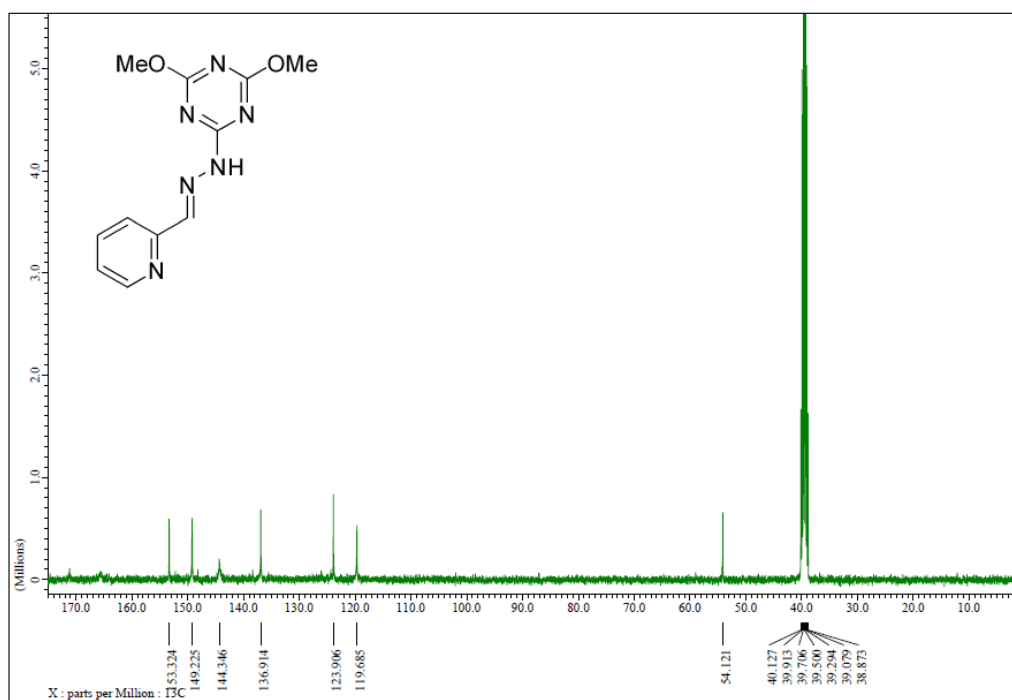

**Figure S10.**  $^1\text{H}$  NMR and  $^{13}\text{C}$  NMR of **7j**

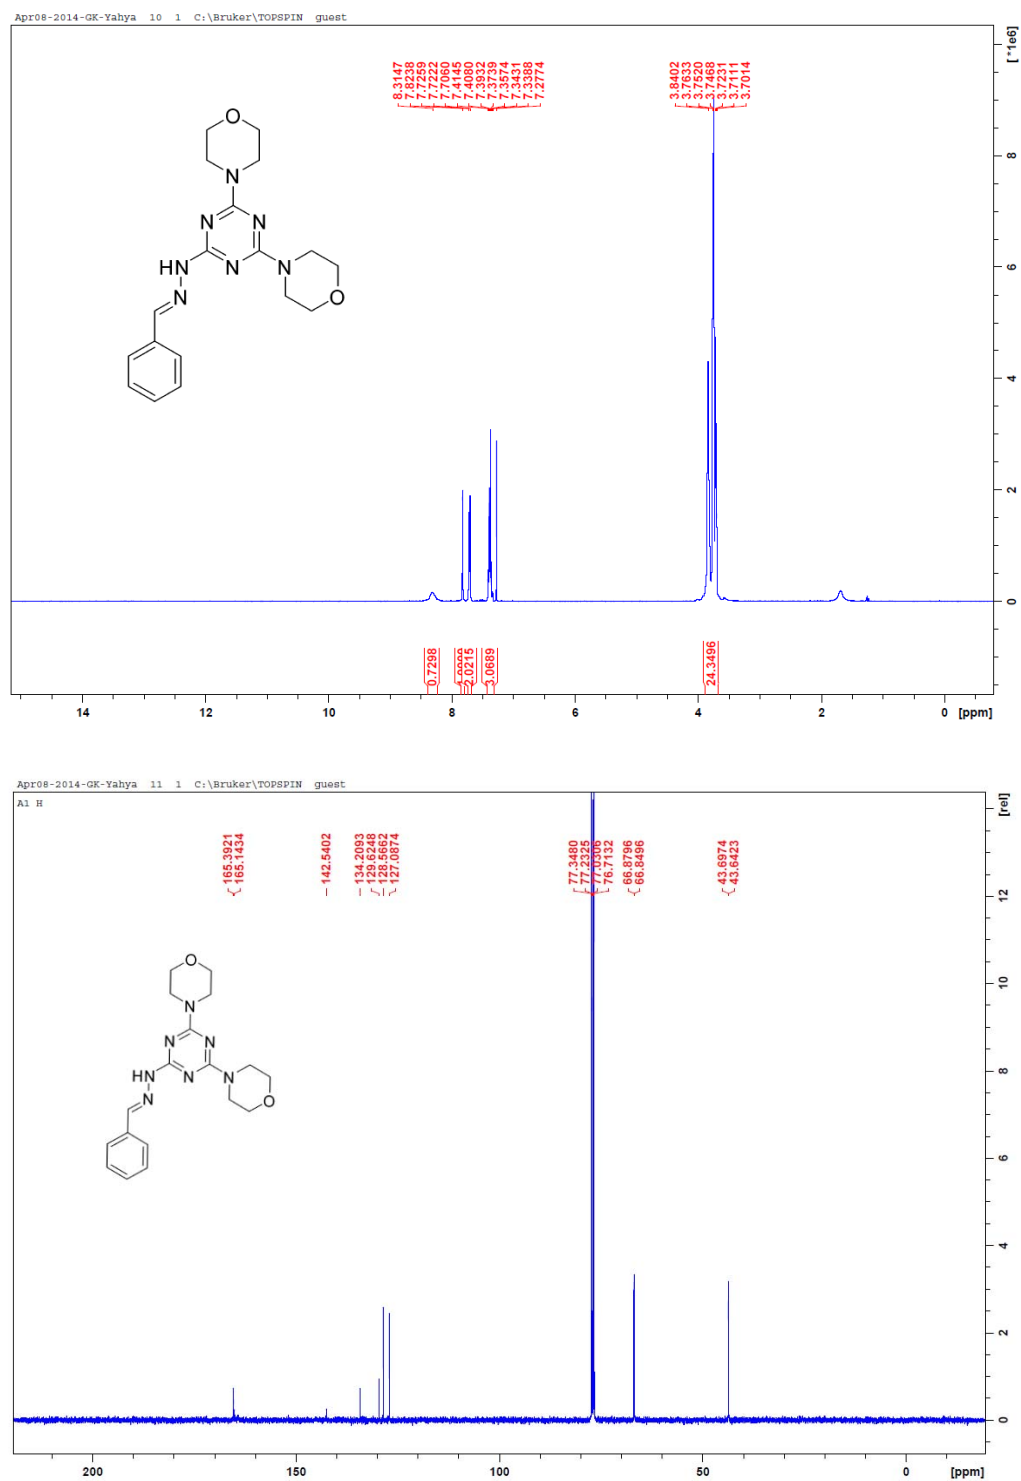

**Figure S11.** LC-MS of Compound **7j**

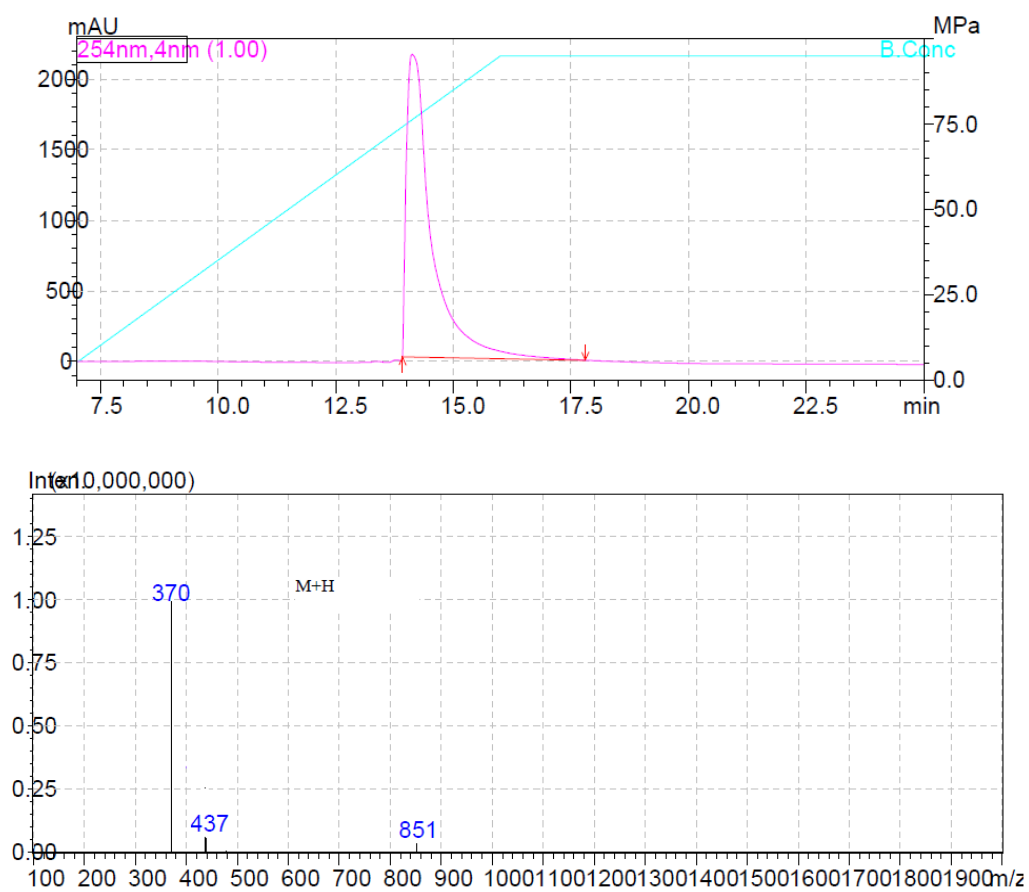

**Figure S12.**  $^1\text{H}$  NMR and  $^{13}\text{C}$  NMR of **7k**

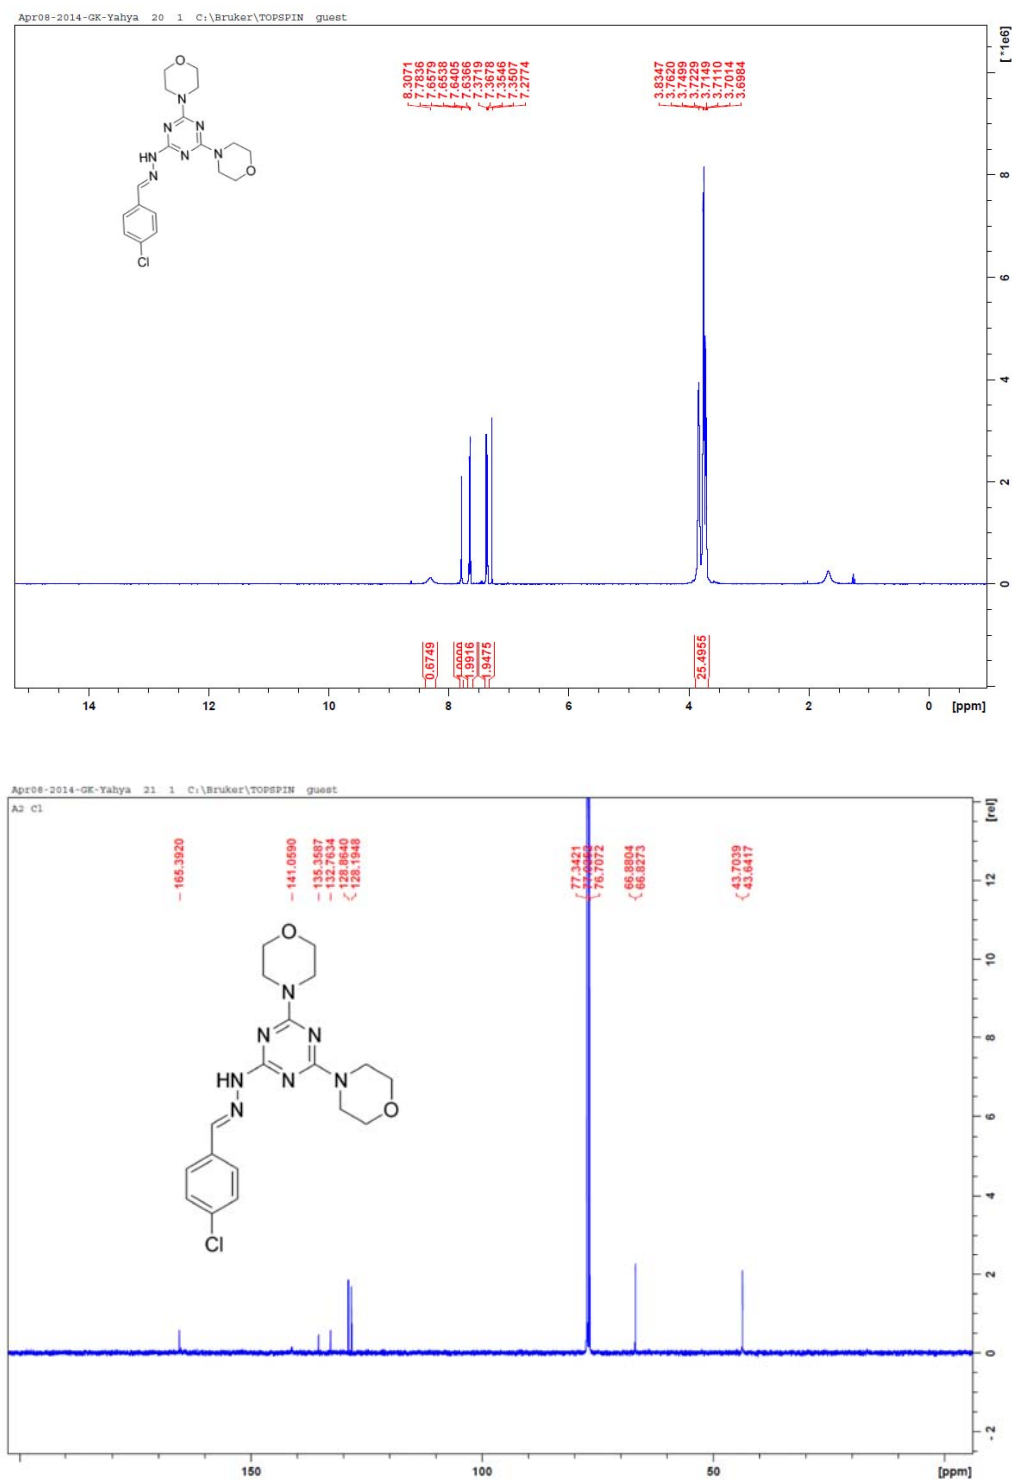

**Figure S13.** LC-MS of Compound 7k

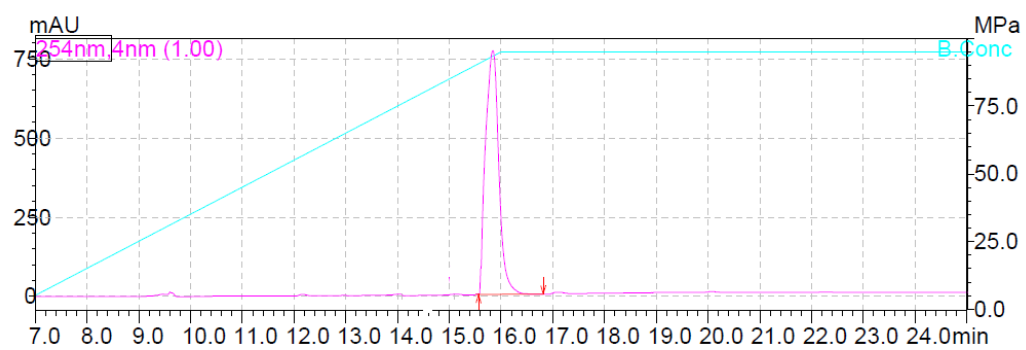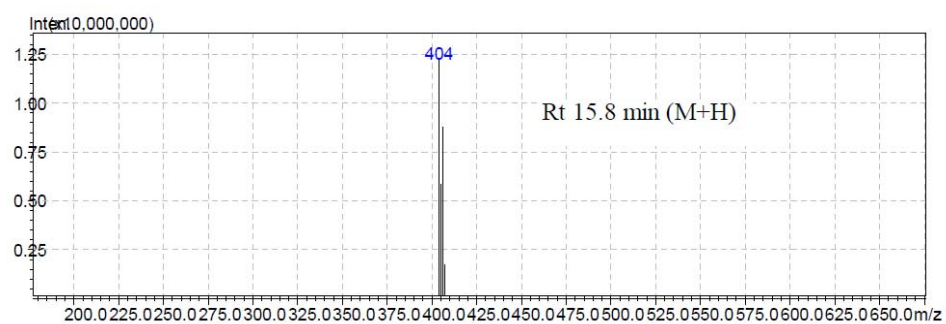

**Figure S14.**  $^1\text{H}$  NMR and  $^{13}\text{C}$  NMR of **7l**

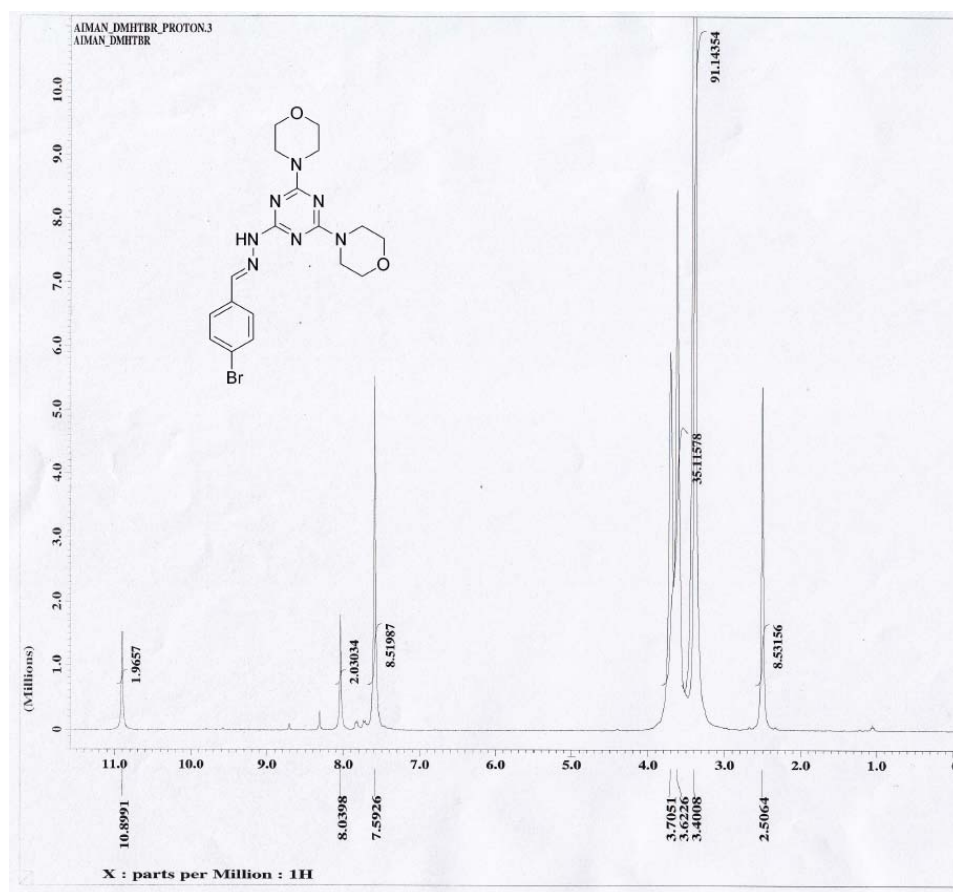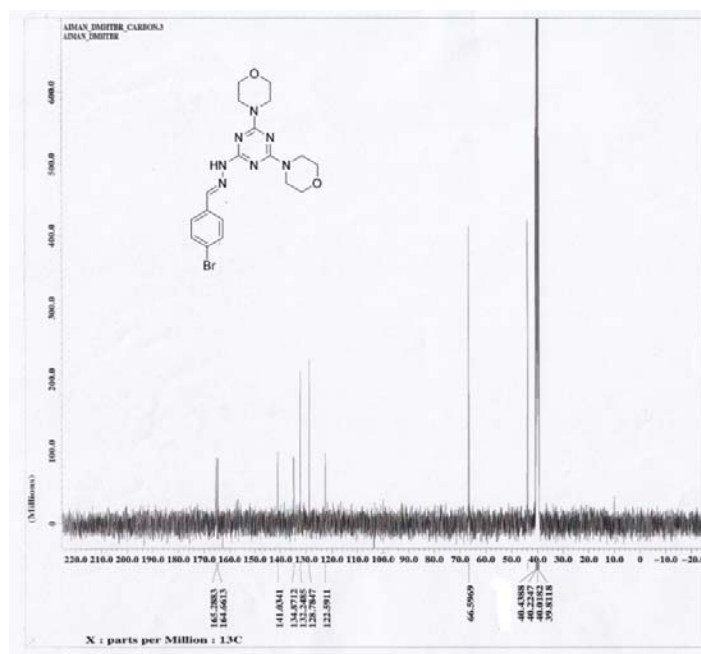

**Figure S15.**  $^1\text{H}$  NMR and  $^{13}\text{C}$  NMR of **7m**

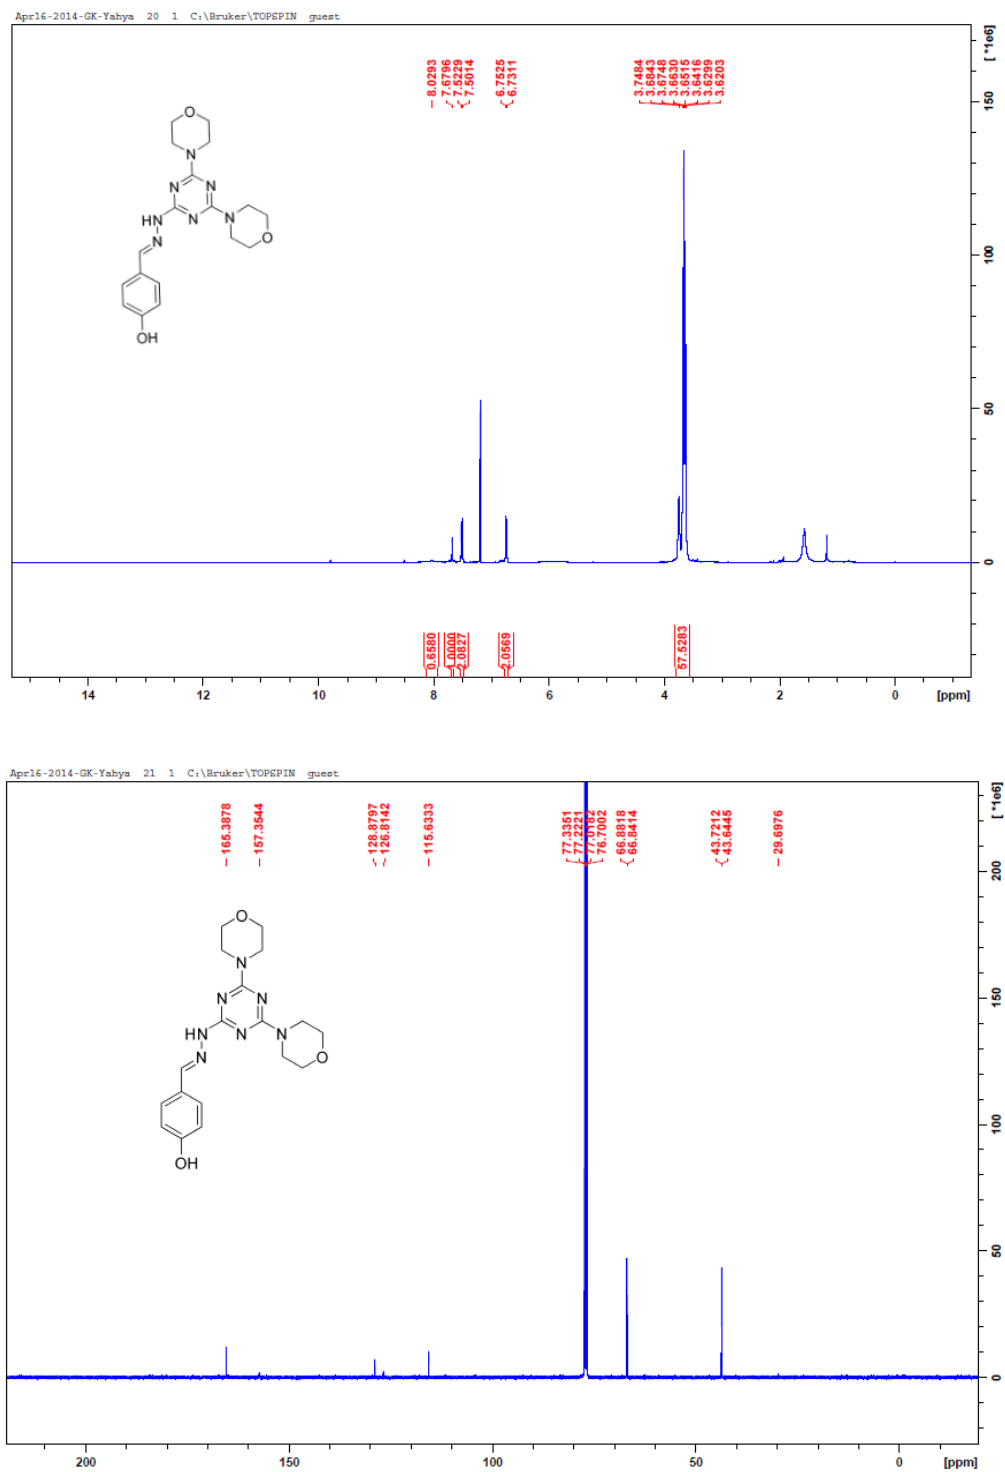

**Figure S16.**  $^1\text{H}$  NMR and  $^{13}\text{C}$  NMR of **7n**

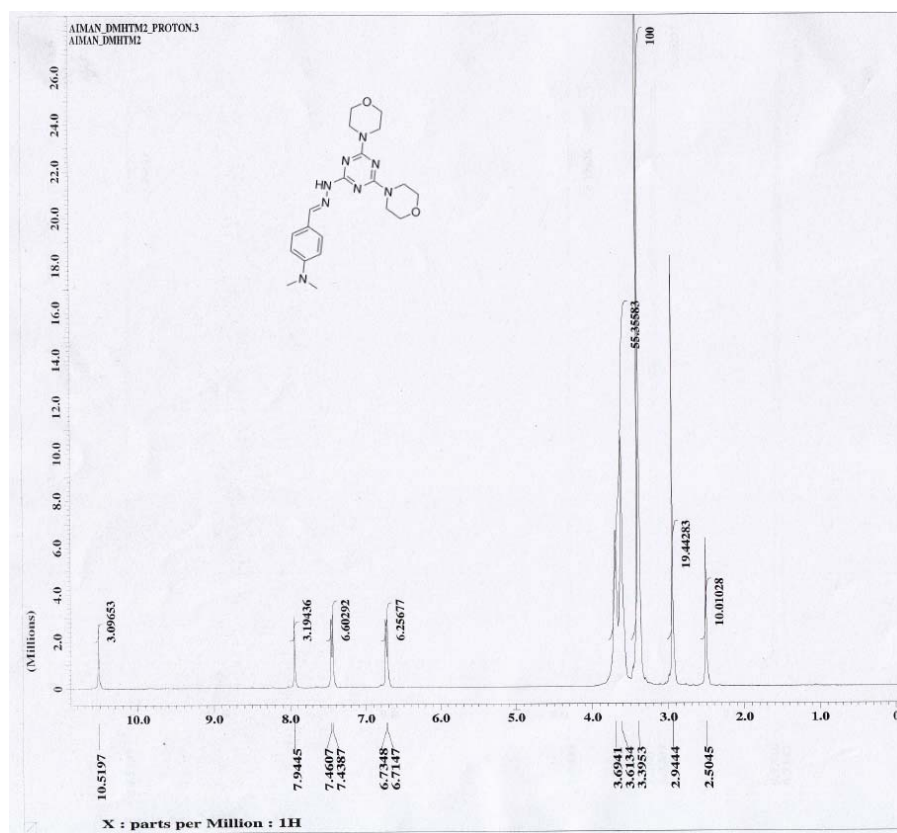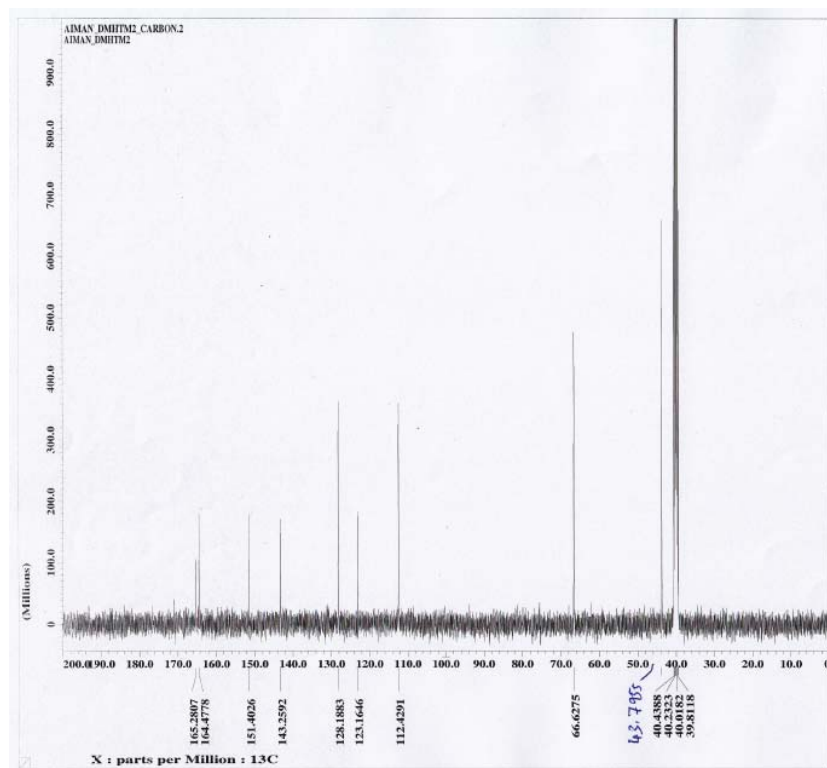

**Figure S17.**  $^1\text{H}$  NMR and  $^{13}\text{C}$  NMR of **7o**

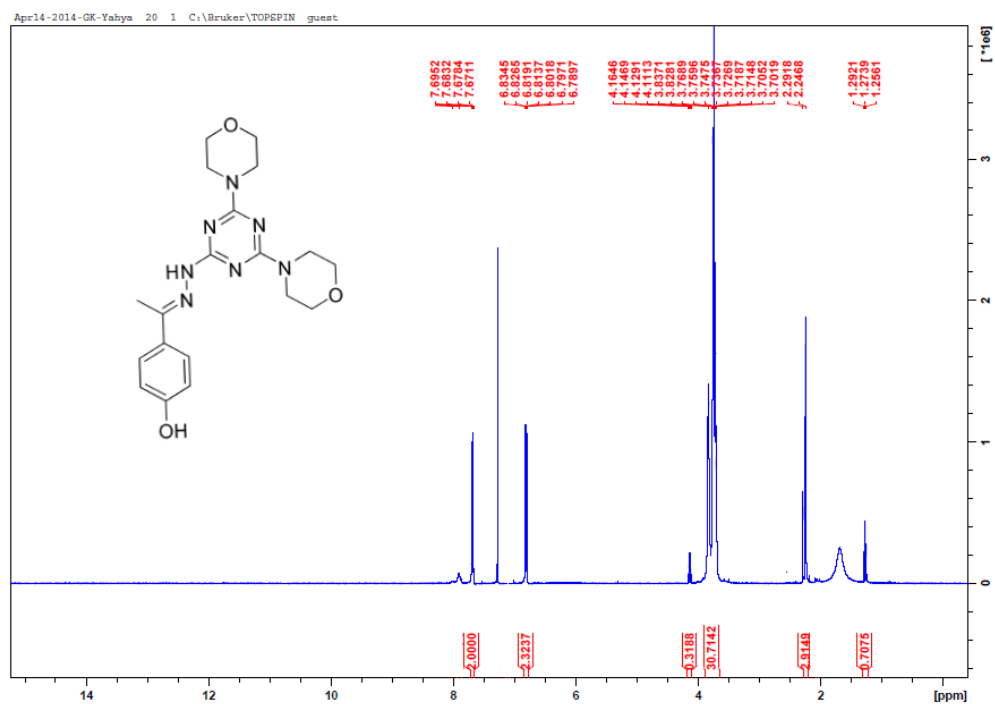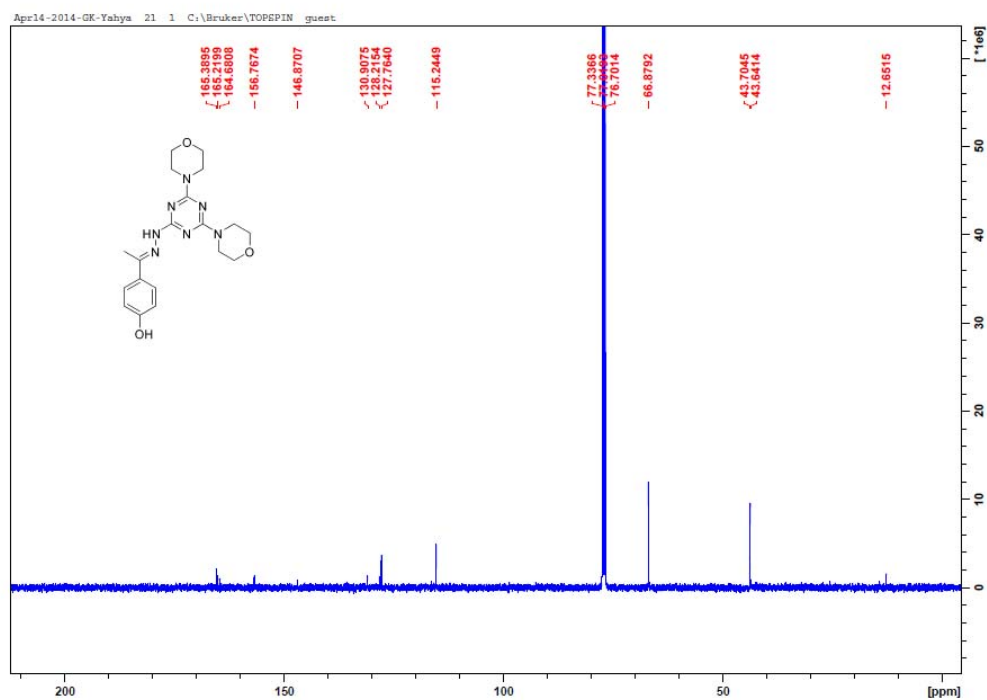

**Figure S18.** LC-MS of compound **7o**

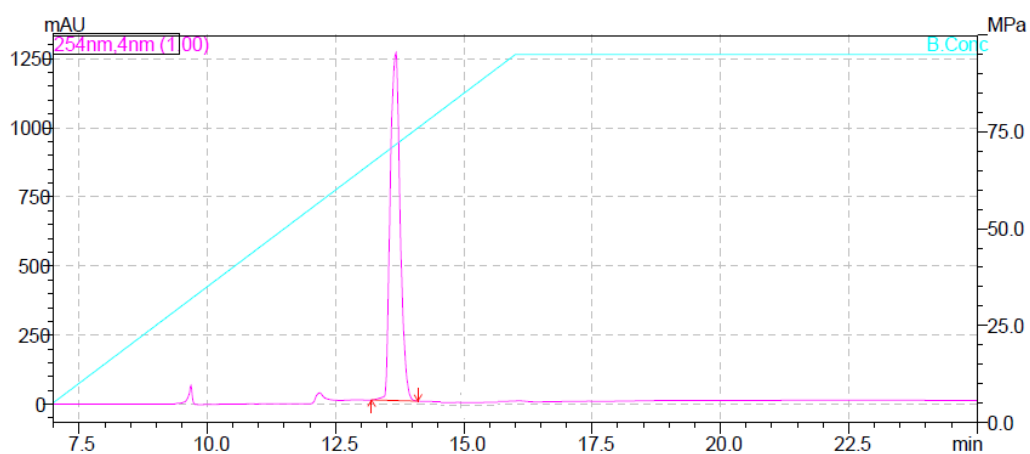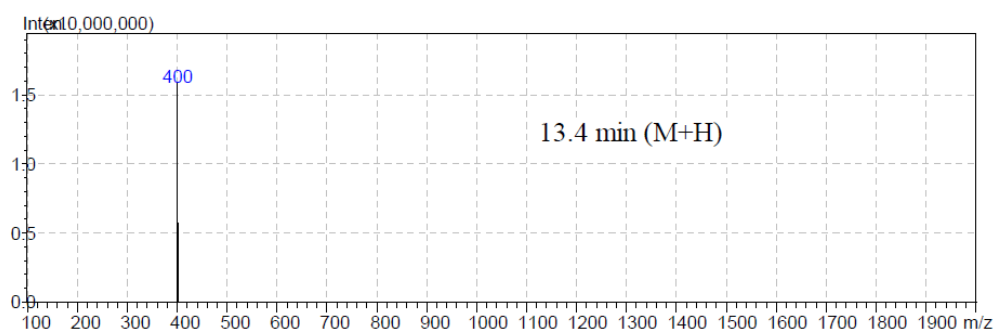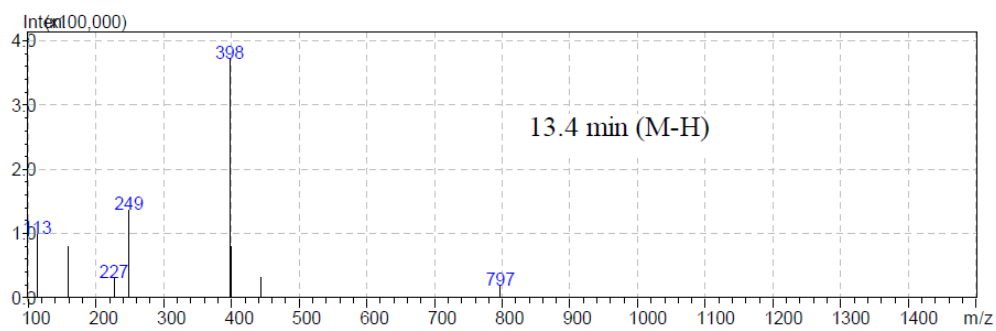

Supplement: f1 [file 3464758.f1.pdf]
